# Supplementary material
Source: PubMed Central journal article supplement (PMC3663266)
Supplement: supp_tpc.113.109710_tpc109710Supplemental.pdf [file supp_tpc.113.109710_tpc109710Supplemental.pdf]

**A**

1. AD-HDA6 / BD-PIF3
2. AD-HDA9 / BD-PIF3
3. AD-HDA19 / BD-PIF3
4. AD-HDA2 / BD-PIF3
5. AD-HDA8 / BD-PIF3
6. AD-HDA14 / BD-PIF3
7. AD-HDA15 / BD-PIF3
8. AD-HDA18 / BD-PIF3
9. AD-HD2A / BD-PIF3
10. AD-HD2B / BD-PIF3
11. AD-HD2C / BD-PIF3
12. AD-HD2D / BD-PIF3
13. AD-SRT1 / BD-PIF3
14. AD-SRT2 / BD-PIF3

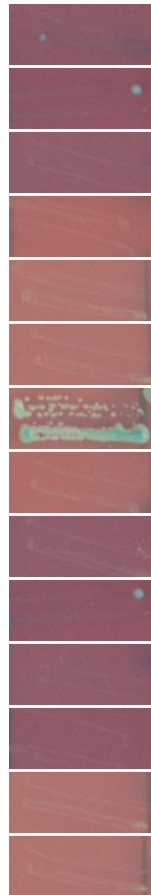

**B**

1. AD-HDA15 / BD-PIF3
2. AD-HDA15 / BD-PIF4
3. AD-HDA15 / BD-PIF5
4. AD-HDA15 / BD
5. AD / BD-PIF3

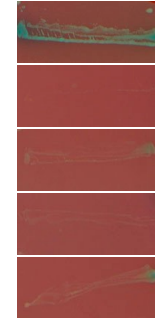

**Supplemental Figure 1** HDA15 specifically interacts with PIF3 in yeast. (A) Protein-protein interaction between PIF3 and HDACs in yeast cells. Full length cDNAs of HDACs and PIF3 were fused with AD and BD vectors, respectively. (B) Protein-protein interaction between HDA15 and PIFs (PIF3, PIF4 and PIF5) in yeast cells. The constructs were cotransformed into the yeast strain AH109 and plated on SD/-Leu-Trp medium. The transformants were then plated on SD/-Leu-Trp-His plus x-a-gal medium to detect the interaction. 0.1 mM 3 AT was added to repress the auto-activation of PIF3 bait (BD-PIF3).

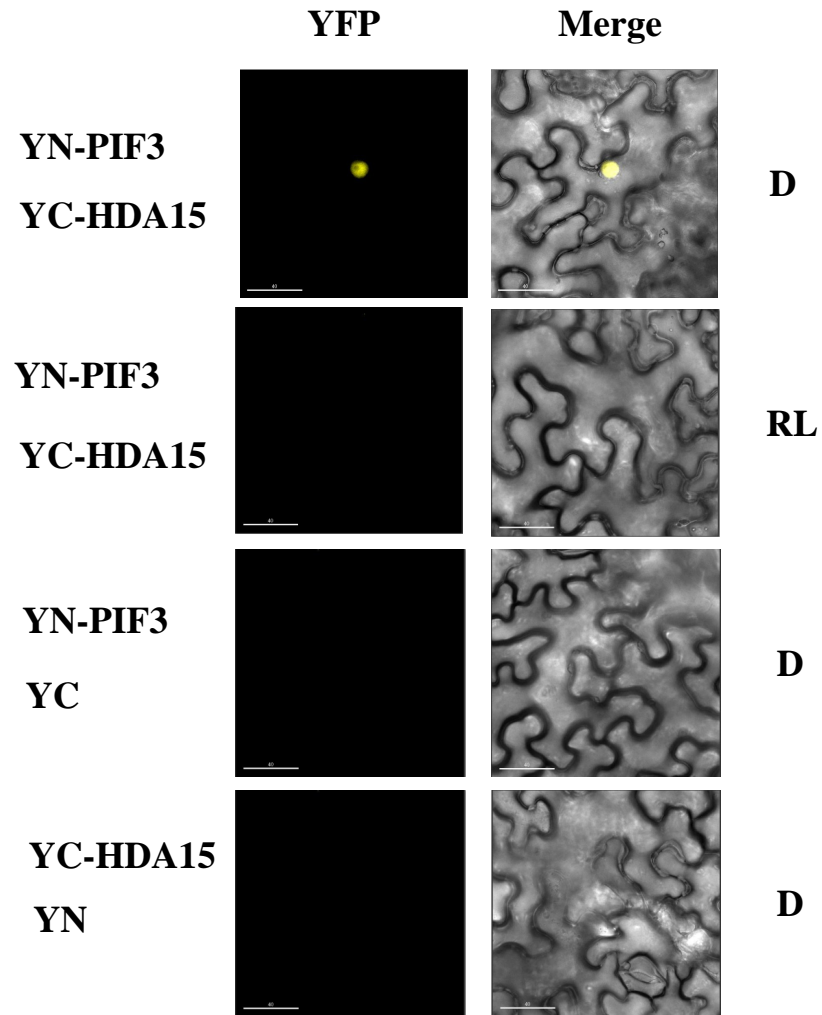

**Supplemental Figure 2.** HDA15 interacts with PIF3 in tobacco epidermal cells in dark. PIF3 and HDA15 fused with the N-terminus (YN) and the C-terminus (YC) of YFP were cotransfected into tobacco leaves with *Agrobacterium* strains (GV3101) and then incubated in dark (D) or red light (RL) at  $10 \mu\text{mol m}^{-2}\text{s}^{-1}$  for 2 days.

**A**

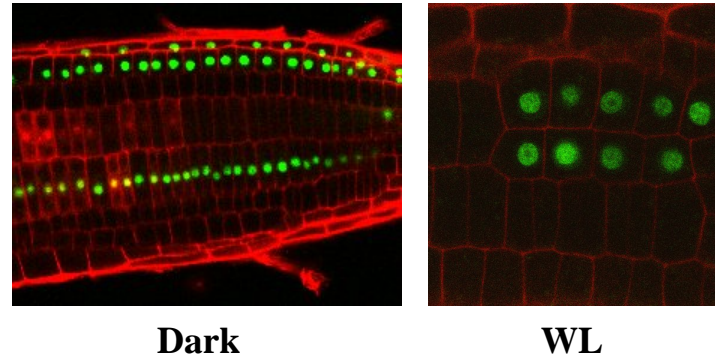

**B**

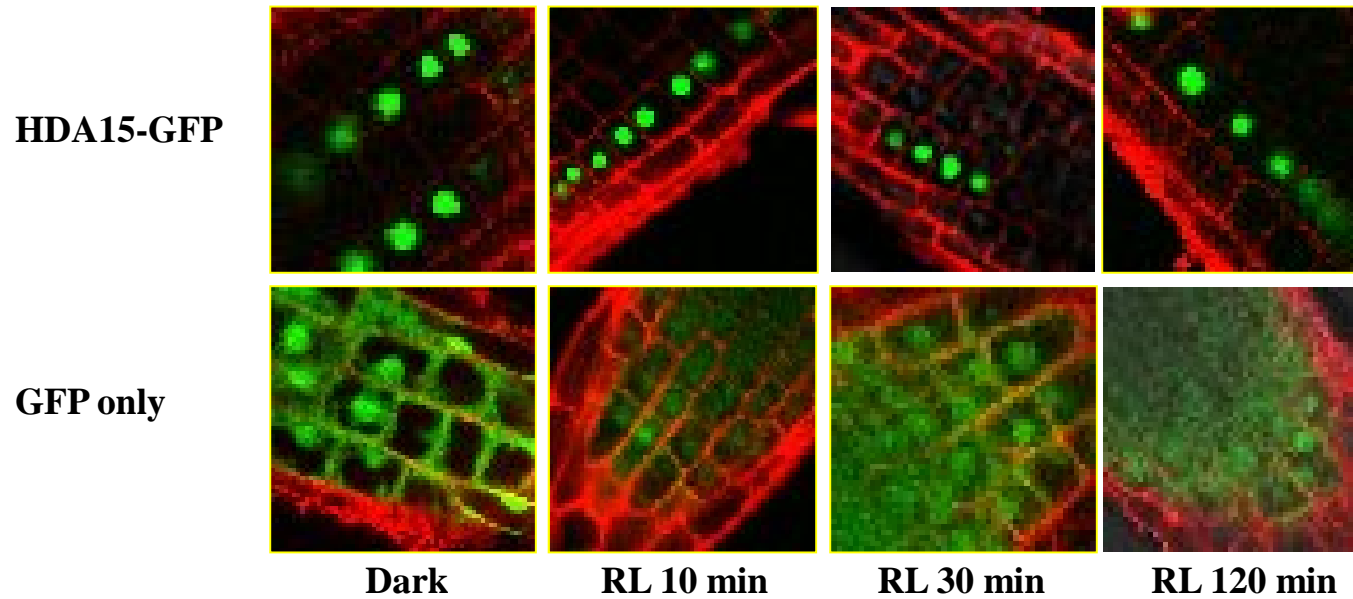

**Supplemental Figure 3.** HDA15 is constitutively localized in the nucleus under dark or light conditions. (A) Subcellular localization of HDA15 in 4-day-old transgenic plants (*35S:HDA15-GFP*). WL, white light,  $100 \mu\text{mol m}^{-2}\text{s}^{-1}$ , (B) Subcellular localization of HDA15-GFP when etiolated seedlings transferred to the RL ( $10 \mu\text{mol m}^{-2}\text{s}^{-1}$ ). Cell walls are stained by propidium iodide.

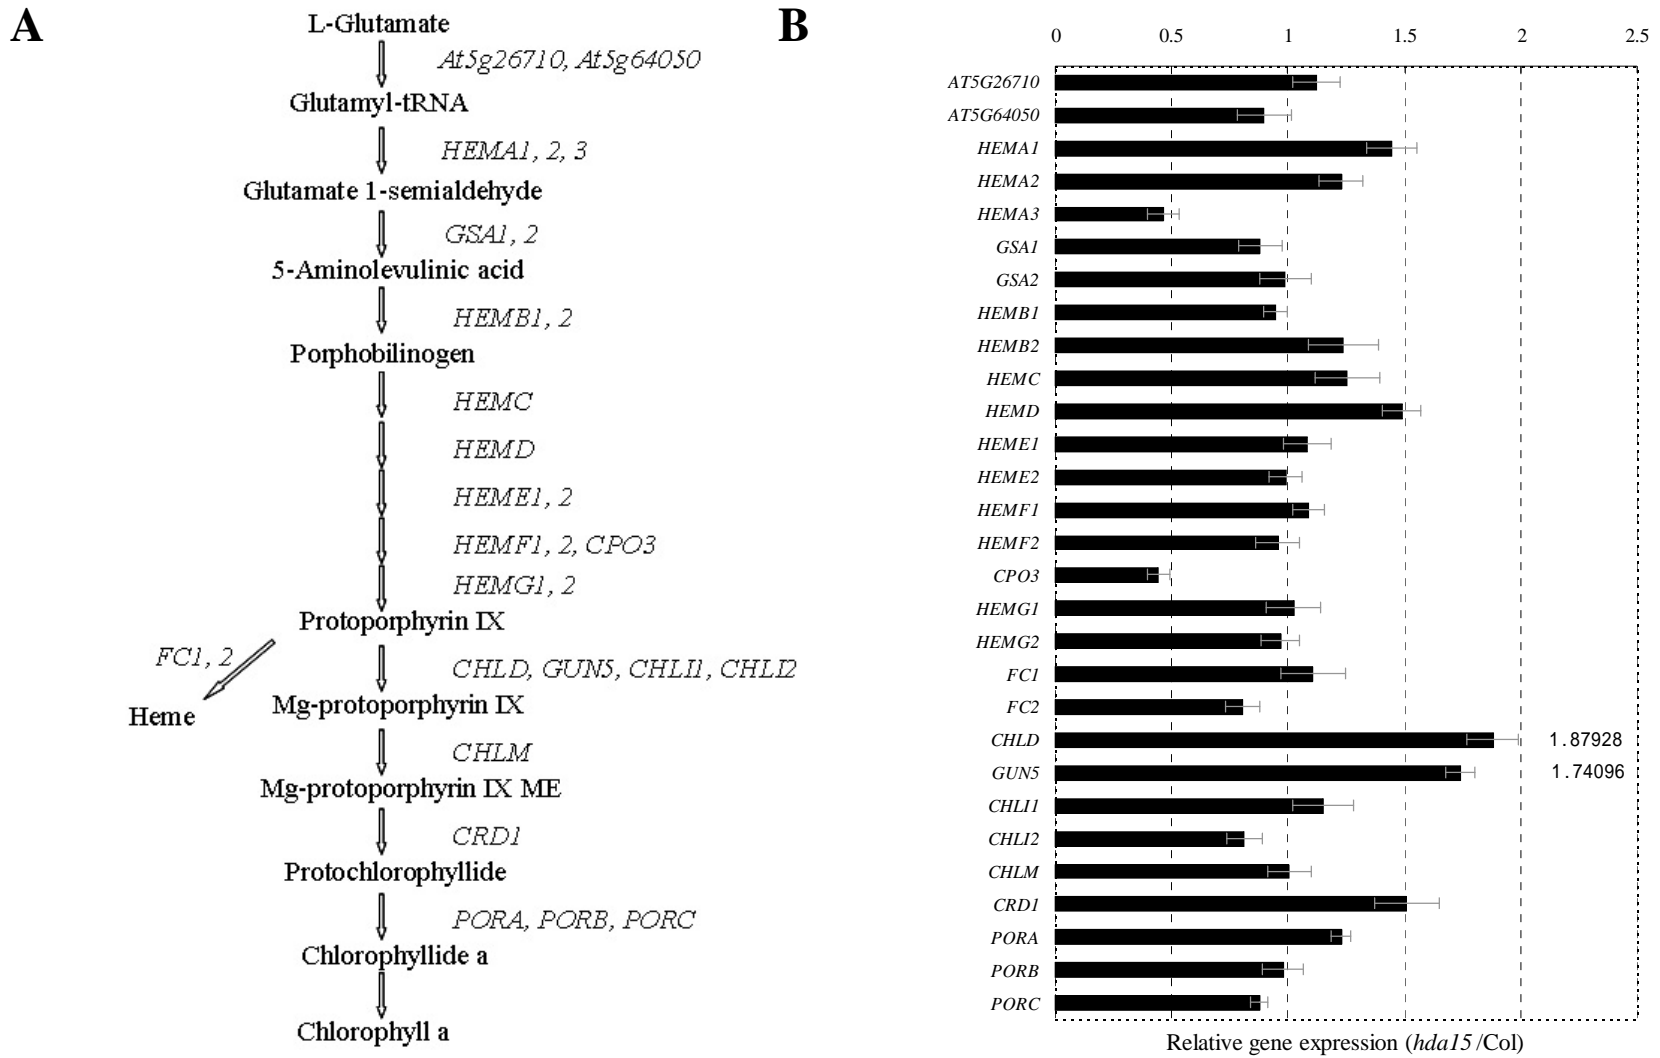

**Supplemental Figure 4.** Expression profiles of genes involved in the chlorophyll biosynthetic pathway in *hda15-1*. (A) A diagram of chlorophyll biosynthesis pathway. (B) Relative expression levels of genes involved in chlorophyll biosynthesis in *hda15-1* seedlings compared with Col seedlings grown in darkness for 2 days. The values are shown as means  $\pm$  SD.

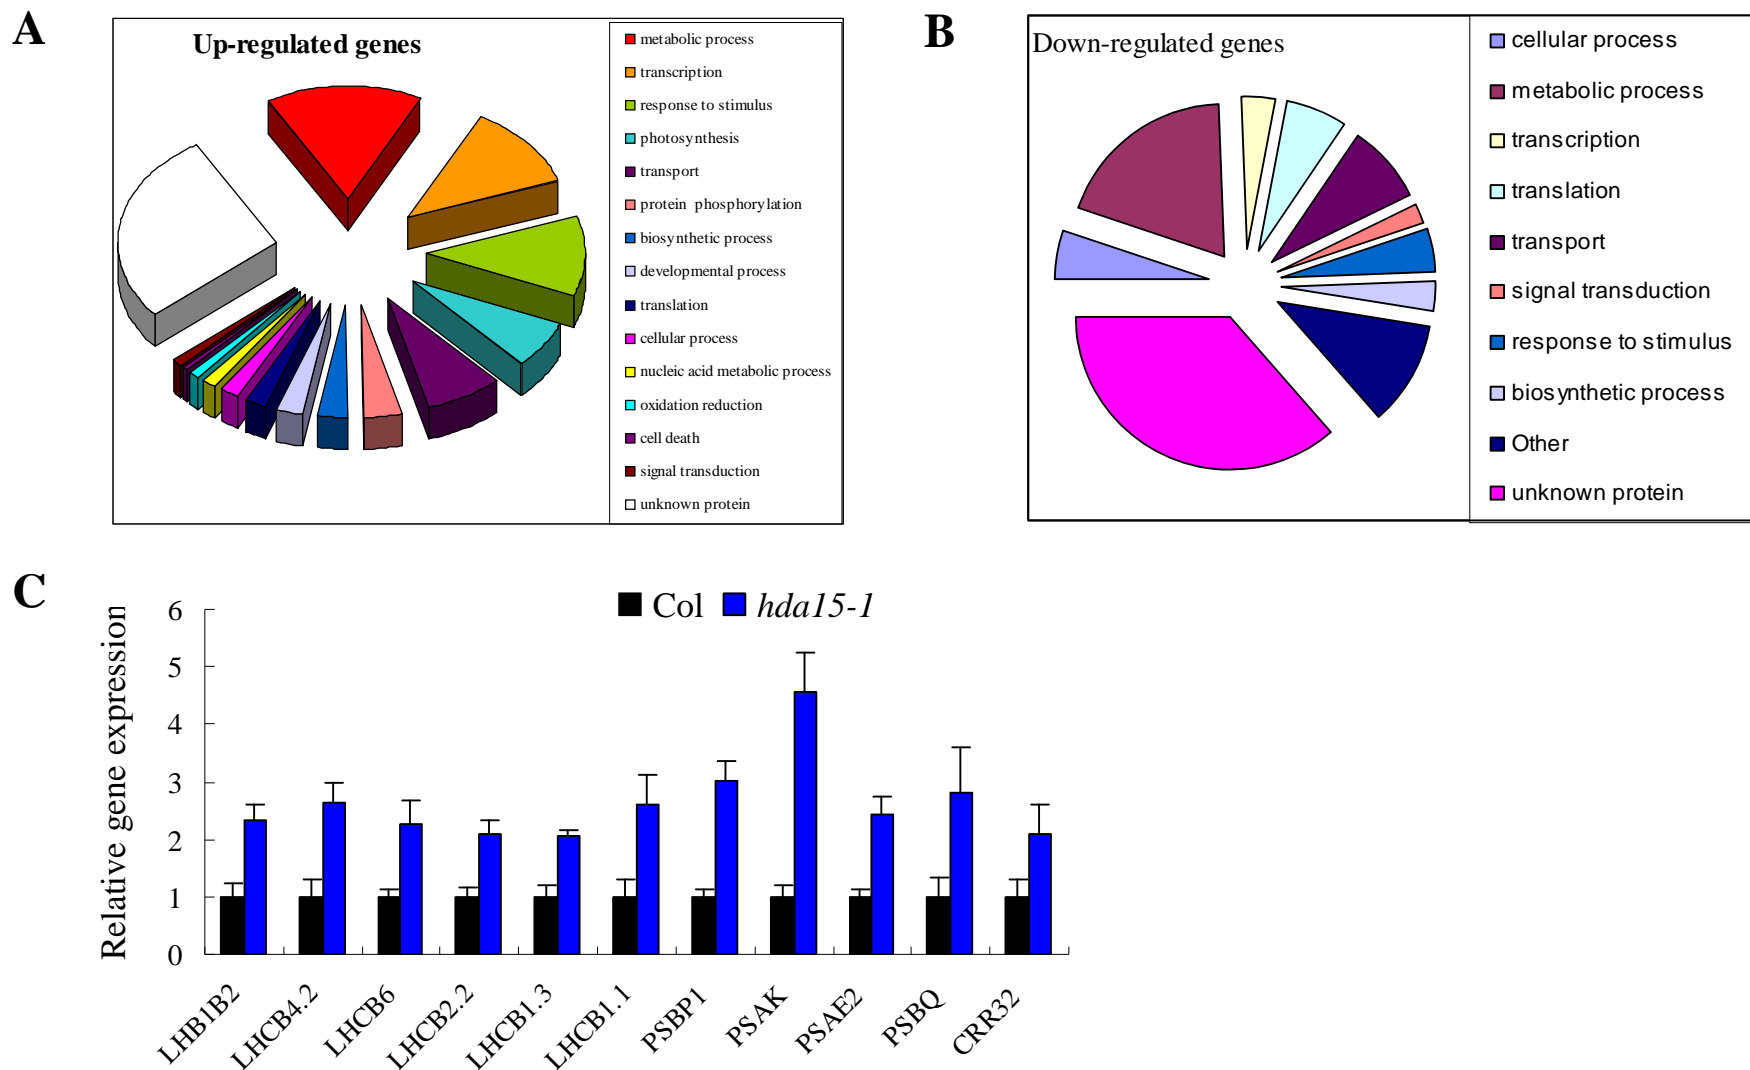

**Supplemental Figure 5.** Microarray analysis of HDA15 regulated genes in 2 day etiolated seedlings. (A, B) Up- and down-regulated genes in *hda15-1* seedlings. (C) qRT-PCR validation of genes expression detected by microarray analysis. *UBQ10* was used as a internal control. The values are shown as means + SD.

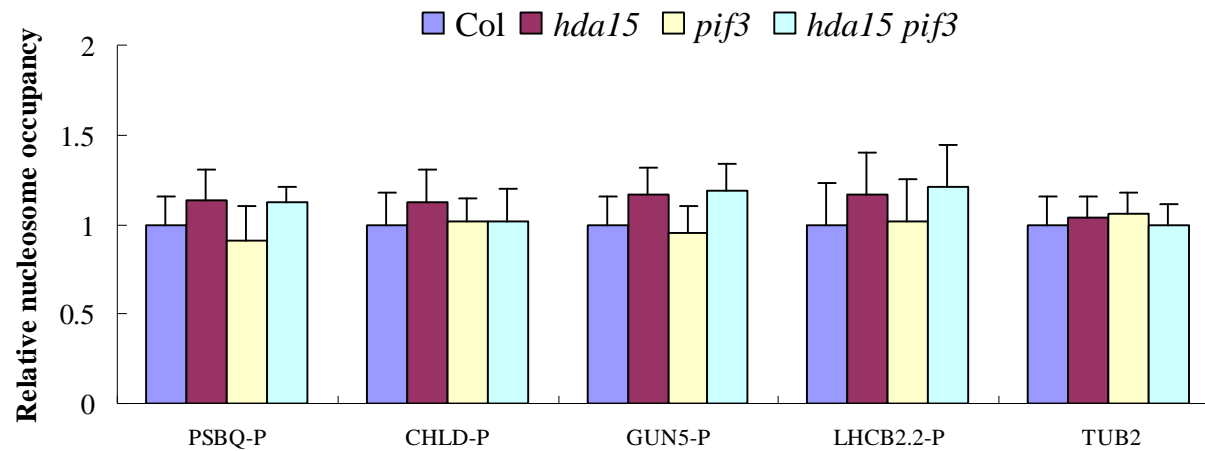

**Supplemental Figure 6.** Nucleosome occupancy analysis of the chlorophyll biosynthetic and photosynthetic genes in etiolated Col, *hda15*, *pif3* and *hda15pif3* seedlings. ChIP-qPCR analysis of DNA fragments co-immunoprecipitated with the anti-H4 antibody relative to Col. *TUB2* was used as a control. P indicated the promoter regions of the genes. The amounts of DNA after ChIP were quantified and normalized to *ACTIN2*. The values are shown as means + SD.

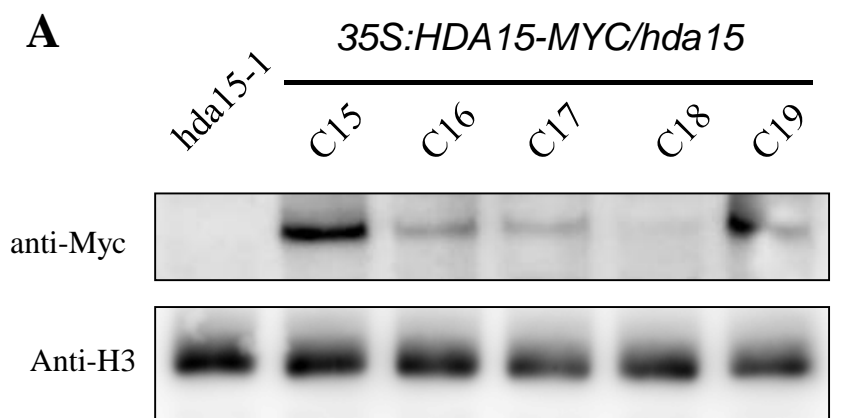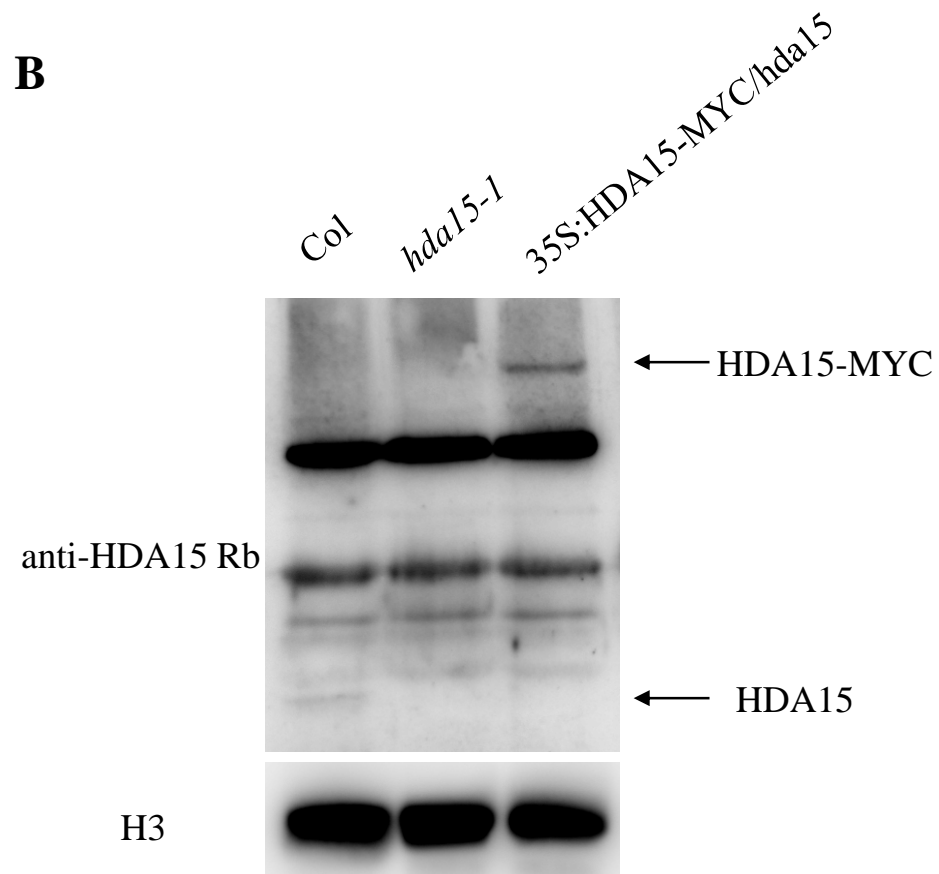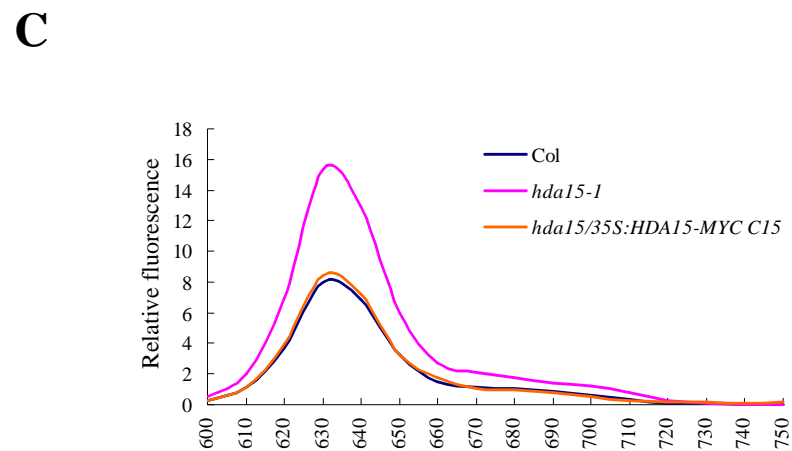

**Supplemental Figure 7.** Identification and analysis of *35S:HDA15-MYC* transgenic plants. (A) Western blot analysis of HDA15-MYC in *35S:HDA15-MYC/hda15* seedlings with anti-myc antibody. *hda15-1* was used as a negative control. C15 to C19 are individual transgenic lines in *hda15-1* background. (B) Western blot analysis of MYC-tagged HDA15 and endogenous HDA15 protein levels of Col and *35S:HDA15-MYC/hda15* transgenic plants with anti-HDA15 antibody. The arrows indicate HDA15-MYC and endogenous HDA15 proteins, respectively. (C) Measurement of protochlorophyllide content of 4-day-old etiolated *35S:HDA15-MYC/hda15* line C15.

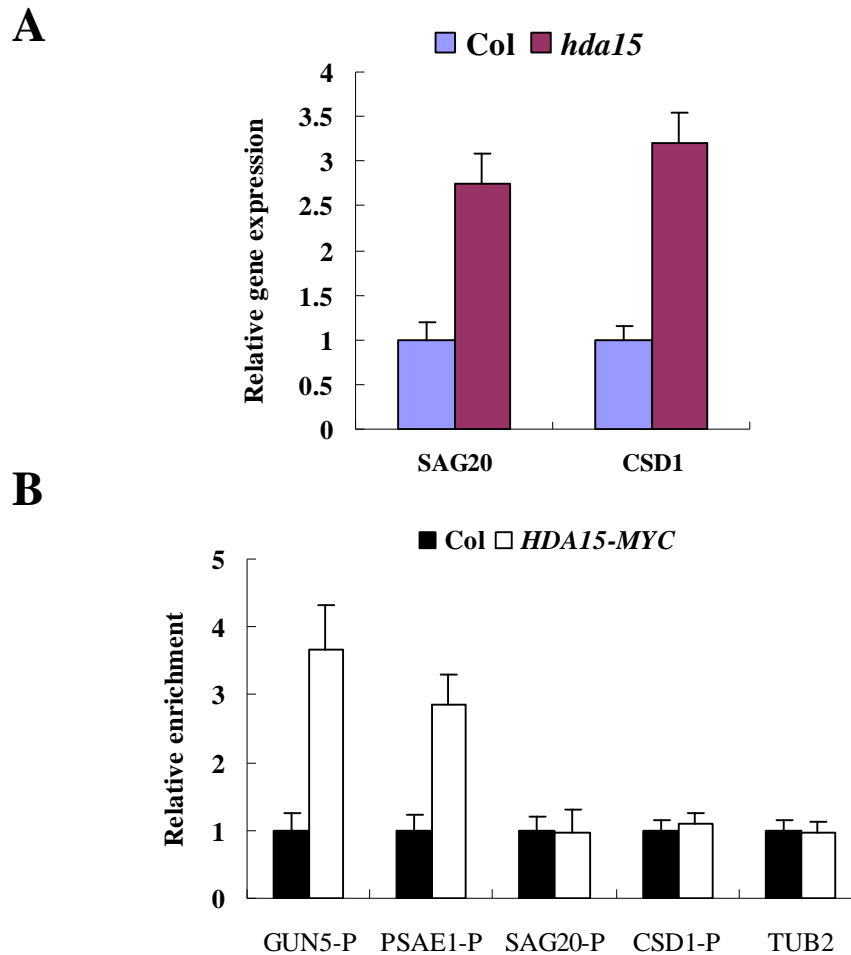

**Supplemental Figure 8.** Detection and validation of HDA15 target genes. (A) qRT-PCR analysis of genes expression detected by microarray analysis. *UBQ10* was used as a internal control. The values are shown as means + SD. (B) ChIP-qPCR analysis of DNA fragments co-immunoprecipitated with the anti-myc antibody relative to Col. *TUB2* was used as a control. P indicated the promoter regions of the genes. The amounts of DNA after ChIP were quantified and normalized to *ACTIN2*. The values are shown as means + SD.



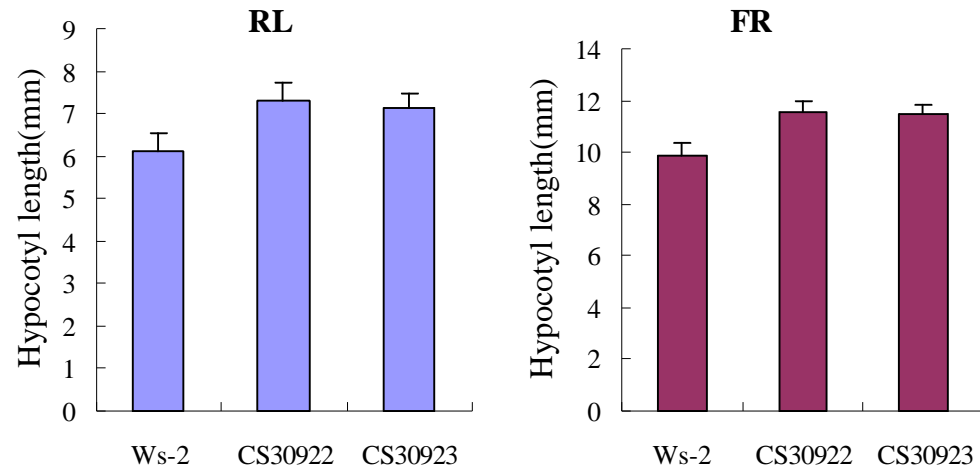

**Supplemental Figure 9.** Phenotypic analysis *HDA15* RNAi seedlings (CS30922 and CS30923) grown in RL and FR for 4 days. RL,  $2.5 \mu\text{mol m}^{-2}\text{s}^{-1}$ , FR,  $2 \mu\text{mol m}^{-2}\text{s}^{-1}$ . The values are shown as means + SD.

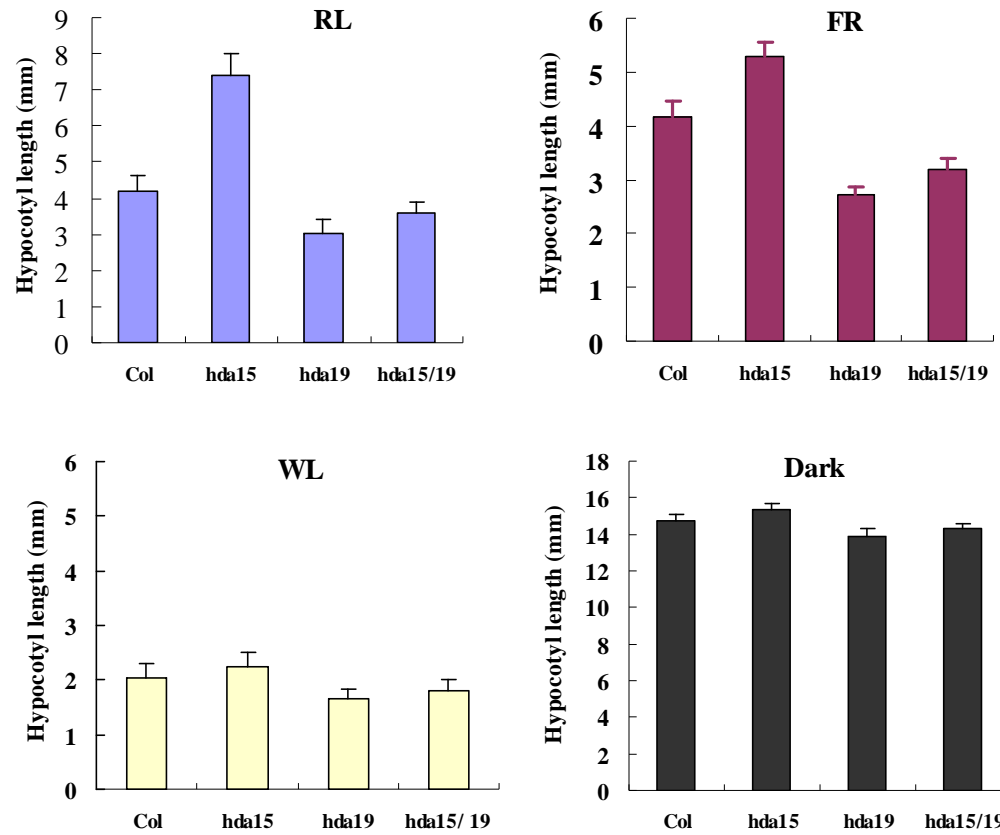

**Supplemental Figure 10.** HDA15 and HDA19 antagonistically regulate hypocotyl elongation. Quantification of hypocotyl lengths of 4-day-old Col, *hda15*, *hda19* and *hda15/19* seedlings under various light conditions. RL, 10  $\mu\text{mol m}^{-2}\text{s}^{-1}$ , FR, 3.5  $\mu\text{mol m}^{-2}\text{s}^{-1}$ , WL, 100  $\mu\text{mol m}^{-2}\text{s}^{-1}$ . The values are shown as means + SD.

**Supplemental Table 1. List of the genes that are induced in 2-day-old etiolated *hda15-1* and *pifq* (Leivar et al., 2009) seedlings relative to the wild-type.**

| Probe Set ID | AGI       | Fold change ( <i>hda15-1</i> /Col) | Fold change ( <i>pifq</i> /Col) | Gene    |
|--------------|-----------|------------------------------------|---------------------------------|---------|
| 249941_at    | AT5G22270 | 1.896                              | 2.230                           |         |
| 251759_at    | AT3G55630 | 1.519                              | 2.005                           | ATDFD   |
| 257641_s_at  | AT3G25760 | 2.132                              | 2.941                           | AOC1    |
| 265481_at    | AT2G15960 | 2.453                              | 3.027                           |         |
| 267523_at    | AT2G30600 | 1.896                              | 2.208                           |         |
| 257832_at    | AT3G26740 | 1.996                              | 2.229                           | CCL     |
| 265894_at    | AT2G15050 | 1.694                              | 2.313                           | LTP     |
| 265387_at    | AT2G20670 | 2.364                              | 2.496                           |         |
| 251221_at    | AT3G62550 | 2.472                              | 2.283                           |         |
| 248186_at    | AT5G53880 | 2.129                              | 2.414                           |         |
| 246880_s_at  | AT5G26000 | 2.072                              | 2.129                           | TGG1    |
| 252415_at    | AT3G47340 | 4.174                              | 2.099                           | ASN1    |
| 259015_at    | AT3G07350 | 2.270                              | 2.111                           |         |
| 255008_at    | AT4G10060 | 2.132                              | 3.300                           |         |
| 260287_at    | AT1G80440 | 2.037                              | 2.585                           |         |
| 245264_at    | AT4G17245 | 2.313                              | 4.568                           |         |
| 260037_at    | AT1G68840 | 1.893                              | 2.364                           | RAV2    |
| 250972_at    | AT5G02840 | 1.691                              | 2.017                           | LCL1    |
| 249010_at    | AT5G44580 | 1.721                              | 2.894                           |         |
| 249694_at    | AT5G35790 | 1.661                              | 3.653                           | G6PD1   |
| 266672_at    | AT2G29650 | 1.581                              | 4.565                           |         |
| 252441_at    | AT3G46780 | 4.668                              | 7.706                           | PTAC16  |
| 266319_s_at  | AT3G10280 | 1.959                              | 2.949                           | HIC     |
| 248684_at    | AT5G48485 | 1.856                              | 3.571                           | DIR1    |
| 258929_at    | AT3G10060 | 1.776                              | 2.571                           |         |
| 247131_at    | AT5G66190 | 1.504                              | 2.294                           | ATLFNR1 |
| 259161_at    | AT3G01500 | 5.192                              | 7.014                           | CA1     |
| 255365_at    | AT4G04040 | 2.243                              | 2.215                           | MEE51   |
| 261118_at    | AT1G75460 | 1.756                              | 4.594                           |         |
| 265051_at    | AT1G52100 | 1.719                              | 2.085                           |         |
| 249927_at    | AT5G19220 | 1.657                              | 3.673                           | ADG2    |
| 255886_at    | AT1G20340 | 1.903                              | 2.287                           | DRT112  |
| 262986_at    | AT1G23390 | 1.649                              | 3.031                           |         |
| 259625_at    | AT1G42970 | 1.644                              | 3.162                           | GAPB    |
| 249645_at    | AT5G36910 | 2.209                              | 2.831                           | THI2.2  |
| 245592_at    | AT4G14540 | 2.045                              | 3.152                           | HAP3    |
| 257745_at    | AT3G29240 | 1.568                              | 3.164                           |         |

|           |           |       |        |         |
|-----------|-----------|-------|--------|---------|
| 248224_at | AT5G53490 | 1.727 | 2.158  | JR1     |
| 259383_at | AT3G16470 | 2.275 | 3.069  |         |
| 260266_at | AT1G68520 | 1.824 | 5.993  |         |
| 251017_at | AT5G02760 | 1.519 | 7.788  |         |
| 261218_at | AT1G20020 | 1.504 | 2.444  | ATLFNR2 |
| 251036_at | AT5G02160 | 1.901 | 4.283  |         |
| 258897_at | AT3G05730 | 2.426 | 9.246  |         |
| 253040_at | AT4G37800 | 2.174 | 27.653 |         |
| 250243_at | AT5G13630 | 1.712 | 5.572  | GUN5    |
| 257008_at | AT3G14210 | 7.332 | 31.751 | ESM1    |
| 256015_at | AT1G19150 | 1.624 | 2.892  | LHCA6   |
| 262632_at | AT1G06680 | 1.841 | 3.014  | PSBP-1  |
| 247073_at | AT5G66570 | 2.155 | 3.666  | PSBO1   |
| 251082_at | AT5G01530 | 1.791 | 3.677  | LHCB4.1 |
| 262557_at | AT1G31330 | 1.687 | 4.088  | PSAF    |
| 258993_at | AT3G08940 | 2.093 | 6.215  | LHCB4.2 |
| 266979_at | AT2G39470 | 1.596 | 2.980  | PPL2    |
| 256309_at | AT1G30380 | 3.618 | 3.395  | PSAK    |
| 259491_at | AT1G15820 | 2.353 | 7.126  | LHCB6   |
| 254970_at | AT4G10340 | 1.813 | 2.774  | LHCB5   |
| 262288_at | AT1G70760 | 1.535 | 4.401  | CRR23   |
| 265287_at | AT2G20260 | 2.419 | 4.505  | PSAE-2  |
| 255248_at | AT4G05180 | 3.804 | 8.085  | PSBQ    |
| 251814_at | AT3G54890 | 2.890 | 15.637 | LHCA1   |
| 261746_at | AT1G08380 | 2.299 | 5.434  | PSAO    |

---

Supplemental Table 2. List of primers used in this study

| Primer                               | Sequence 5'~3'                   |
|--------------------------------------|----------------------------------|
| Primer pairs for quantitative RT-PCR |                                  |
| UBQ10 RT pr1                         | GATCTTTGCCGGAAAACAATTGGAGGATGGT  |
| UBQ10 RT pr2                         | CGACTTGTCATTAGAAAGAAAGAGATAACAGG |
| LHCB2.2 RT pr1                       | ATGGCGTCGAACTCGC                 |
| LHCB2.2 RT pr2                       | GTTGAAAGGGATAACAATATCGCC         |
| LHCB4.2 RT pr1                       | TTAGTGATCGGCTACATTGAG            |
| LHCB4.2 RT pr2                       | GAGCATGTTTGATCTCAGCTA            |
| LHCB6 RT pr1                         | GGCTTTTCTGAAATGGTACAG            |
| LHCB6 RT pr2                         | CTCTCCAGCTTCTCAAAGTC             |
| PSBQ RT pr1                          | GAACGTGTCAGTACCAGAAAG            |
| PSBQ RT pr2                          | TTGCTTGGTCTGAGTTATCTG            |
| PSAE1 RT pr1                         | ACCACCGATTGGTCCTAAGAG            |
| PSAE1 RT pr2                         | GCGTAATTGACTTTTGCGAAC            |
| PSAK RT pr1                          | TGATGACTACATTGCCTCAGT            |
| PSAK RT pr2                          | TACACCGATGATATGACCAAC            |
| LHB1B1 RT pr1                        | ATGGCCGCCTCGACAATG               |
| LHB1B1 RT pr2                        | CTTTCCGGGGACGAAGTTG              |
| CHLD RT pr1                          | TGCAATCTCCTCCCTGATCT             |
| CHLD RT pr2                          | TCCGTCTCCGTATCCGTATC             |
| GUN5 RT pr1                          | CAACCAAACCAGCCAAATCT             |
| GUN5 RT pr2                          | AGAGATTGCACGGCTTCACT             |
| LHB1B2 RT pr1                        | ACCGTGAGCTAGAAGTTATCC            |
| LHB1B2 RT pr2                        | TCCAAACATAGAGAACATAGCC           |
| LHCB1.3 RT pr1                       | AGAGGCATTCGCTGAGTTGA             |
| LHCB1.3 RT pr2                       | TCCCTTACCAGTGACGATGG             |
| LHCB1.1 RT pr1                       | CTGCGTCTTCCCTGAGCTTT             |
| LHCB1.1 RT pr2                       | ATGCTCTGAGCGTGAACCAA             |
| PSBP1 RT pr1                         | TCCTTAGGTTCTGAAGACAAC            |
| PSBP1 RT pr2                         | TGAGATGATGACTCCAGAATG            |
| PSAE2 RT pr1                         | AGCTACCGGATTTATTCTCAC            |
| PSAE2 RT pr2                         | TCCTTAGAATCTTGACCTTGG            |
| CRR23 RT pr1                         | AGCAAAGGCCTGTGATATACT            |
| CRR23 RT pr2                         | AGGAAGTACCAAACGGATATG            |
| AT5G26710 RT pr1                     | TCCACCACTTTCAGTCATCG             |
| AT5G26710 RT pr2                     | TCGCTGATCGACCAACATAG             |
| AT5G64050 RT pr1                     | GCTCCAGCTTTTCTCAGACG             |
| AT5G64050 RT pr2                     | AGCAGTCCTTGCTCCACCTA             |
| HEMA1 RT pr1                         | TCAAGTGCTTTCGTTGGTTG             |
| HEMA1 RT pr2                         | CGAGCTTTTTGGATCAAACC             |

HEMA2 RT pr1  
HEMA2 RT pr2  
HEMA3 RT pr1  
HEMA3 RT pr2  
GSA1 RT pr1  
GSA1 RT pr2  
GSA2 RT pr1  
GSA2 RT pr2  
HEMB1 RT pr1  
HEMB1 RT pr2  
HEMB2 RT pr1  
HEMB2 RT pr2  
HEMC RT pr1  
HEMC RT pr2  
HEMD RT pr1  
HEMD RT pr2  
HEME1 RT pr1  
HEME1 RT pr2  
HEME2 RT pr1  
HEME2 RT pr2  
HEMF1 RT pr1  
HEMF1 RT pr2  
HEMF2 RT pr1  
HEMF2 RT pr2  
CPO3 RT pr1  
CPO3 RT pr2  
HEMG1 RT pr1  
HEMG1 RT pr2  
HEMG2 RT pr1  
HEMG2 RT pr2  
FC1 RT pr1  
FC1 RT pr2  
FC2 RT pr1  
FC2 RT pr2  
CHLI1 RT pr1  
CHLI1 RT pr2  
CHLI2 RT pr1  
CHLI2 RT pr2  
CHLM RT pr1  
CHLM RT pr2  
CRD1 RT pr1  
CRD2 RT pr2  
PORA RT pr1

TTTCTAGCGCCTTCGTTGTT  
CGCTCTCTGGATCAGACCTC  
AGAGAAGCAGCATTGTGGTG  
GTGATTCAAAGCGCACAACT  
TTACAGGATCGGGAAGTCTGCT  
GCAGCATTGAAAGCTTCCTC  
CGCTTACTGGATCAGGGATT  
GCAGCATTGAAAGCTTCCTC  
AGGCTGAAGGAGCAGACATT  
AACTTGGTATGCAGCAATCG  
AGAGAGCTGCCTTCCAAGAG  
GTCTCCAGCCAAGCATGTAA  
TAGCCTCACTGAACCACGAG  
TGCGTATCCAGCAATAGGAG  
GGTGCAGAGTGTTGATACGG  
GCAACGTAATTGCTCCATTG  
TGAGCGAATGAAAGGAACTG  
CAGGAAGCGGAGAGAATAGG  
AGACCGGCTAGGAAGAGACA  
TGAATCCGGCTTGTGATAAA  
TAGGGCTGCTCAAGACAGTG  
CTCAAAGACATTCCCGTCTT  
TTCCGGAAACAGAAAGACCT  
TTCTTCGACTGCTTCAATGG  
CGAGTTATGTTGGAGGGTTGA  
TCACCATTTCACACCAGTTT  
CGACGACTCAATCGCTTCTT  
TAATACCTCCGCCGACAATC  
CGAGGGGTTTGAATGTGACT  
TTTCTCACGAAGCCCAAGAT  
CTCTACAACGGGTTCAAGCA  
CTTCTCAATGAGGTCAGCCA  
TTGCATATGTGGAAGAAGCC  
CTGGTCCAACCTCTGCTCTGA  
GGAATCCAAATAAGGCCAAA  
AAATGGATAAACCGGTCTCG  
CATCCTGCTCGGTTTATCCT  
GCGTCTCTAACCGTCCCTAC  
GCTATGGTTGCTGAAGCTGA  
GCGGGTAATGTATCAACACG  
AGAGTTCGAGGCTCTGCTTC  
CAACGAAGATCTGTGCGGAGA  
CCTTCAAGCTGCTTCTTTGG

|              |                          |
|--------------|--------------------------|
| PORA RT pr2  | AGTTGAAGTCGCGATTGCTT     |
| PORB RT pr1  | TCCGAACATGGATCTTCCTC     |
| PORB RT pr2  | CACGTTCCATTTCCCTGTCT     |
| PORC RT pr1  | ACAGGGTTGTTTCAGAGAACACAT |
| PORC RT pr2  | CAATACACTCCTGACTTCCCAAG  |
| SAG20 RT pr1 | TTCGTACCTCTCTCCGTCGT     |
| SAG20 RT pr2 | AGCAACAACGTTACCGATCC     |
| CSD1 RT pr1  | GGAACTGCCACCTTCACAAAT    |
| CSD1 RT pr2  | TCCAGTAGCCAGGCTGAGTT     |

**Primer pairs used for ChIP-qPCR analysis**

|               |                               |
|---------------|-------------------------------|
| ACTIN2 pr1    | CGTTTCGCTTTTCCTTAGTGTTAGCT    |
| ACTIN2 pr2    | AGCGAACGGATCTAGAGACTCACCTTG   |
| TUB2 pr1      | ACAAACACAGAGAGGAGTGAGCA       |
| TUB2 pr2      | ACGCATCTTCGGTTGGATGAGTGA      |
| PSBQ-P pr1    | ATCGCATTCTGGGAACACTC          |
| PSBQ-P pr2    | TTGGTGTGTTGGTTATGTGACAA       |
| GUN5-P pr1    | CACTCCCAAACCATGAAAATATG       |
| GUN5-P pr2    | GTTGGTTTTGAAGGTAAGTGGTG       |
| LHCB2.2-P pr1 | GCTCTCTGTTATCCTGTGACCTC       |
| LHCB2.2-P pr2 | GACCAACCAATACTCACGTGTTTCTT    |
| PSAE1-P pr1   | TACACGTGGCAGATCTCAAGT         |
| PSAE1-P pr2   | ATATGTTTCGTAAGGCTAAGAAAAGAGGA |
| GUN5-S pr1    | CACCACTTACCTTCAAACCAAC        |
| GUN5-S pr2    | CGAAGAGGAGAGGATAGGAGAAG       |
| LHCB2.2-S pr1 | GAATCAGAACCCTCTGACGTG         |
| LHCB2.2-S pr2 | GGAGGATTGTTGGATAGCTGA         |
| PSBQ-S pr1    | TCCGAGTAATCTAAGTAACAACGTG     |
| PSBQ-S pr2    | CTTCAAGGACAGCCTGAGATG         |
| PSAE1-S pr1   | TCCTCTTTTCTTAGCCTTACGAAC      |
| PSAE1-S pr2   | CATTGGCCGGTAGAACAAATA         |
| GUN5-E pr1    | CAACCAAACCAGCCAAATCT          |
| GUN5-E pr2    | AGAGATTGCACGGCTTCACT          |
| LHCB2.2-E pr1 | ATGGCGTCGAACTCGC              |
| LHCB2.2-E pr2 | GTTGAAAGGGATAACAATATCGCC      |
| PSBQ-E pr1    | GAACGTGTCAGTACCAGAAAG         |
| PSBQ-E pr2    | TTGCTTGGTCTGAGTTATCTG         |
| PSAE1-E pr1   | TATTTGTTCTACCGCCAATG          |
| PSAE1-E pr2   | ACCCTCTCTTAGGACCAATCG         |
| GUN5-A pr1    | AAAAAGAGAATGAAGCGGTACTC       |
| GUN5-A pr2    | AAATGGAGCAATACATGTAGCC        |
| LHCB2.2-A pr1 | GCCGGAGTGTAACAGGTTTG          |
| LHCB2.2-A pr2 | ACATGGAGCGAGAGAGAGGA          |
| PSBQ-A pr1    | CAGTTGTGAACGCCAAAATG          |

|              |                       |
|--------------|-----------------------|
| PSBQ-A pr2   | TTATCTACTGGCGGGTCAGG  |
| PSAE1-A pr1  | GCACAGAAACGTTTAGGGAAA |
| PSAE1-A pr2  | TTGATGTAGCGCCAACACTT  |
| LHB1B1-P pr1 | AAATCTGATGCCAGCTCGAC  |
| LHB1B1-P pr2 | GTGAGAGTGTGGCGCAAGTA  |
| LHCB6-P pr1  | GCCACATAATGCAGCCATTT  |
| LHCB6-P pr2  | CACCCACACTCACCACTGTC  |
| SAG20-P pr1  | ACGGTGGGGTCAAACATTAG  |
| SAG20-P pr2  | GGGGTTGGGATCTGATTCTC  |
| CSD1-P pr1   | TCTTGTCTCGTCTGTGCTG   |
| CSD1-P pr2   | CGCCGATCATAAATCGAAAA  |

---
